# Supplementary material
Source: HighWire-hosted journal article supplement (https://bmjopen.bmj.com/content/9/5/e026056)
Supplement: inline-supplementary-material-1 [file inline-supplementary-material-1.pdf]

**Supplementary file: Example Search String for Systematic Review**

|                                                                     |
|---------------------------------------------------------------------|
| 1. exp burn/                                                        |
| 2. burn*.tw.                                                        |
| 3. scald*.tw.                                                       |
| 4. thermal injur*.tw.                                               |
| 5. exp wound infection/                                             |
| 6. wound infection*.tw.                                             |
| 7. infection*.tw.                                                   |
| 8. bacteria*.tw.                                                    |
| 9. exp clinical trial/                                              |
| 10. clinical trial.tw                                               |
| 11. observ*.tw.                                                     |
| 12. trial*.tw.                                                      |
| 13. interven*.tw.                                                   |
| 14. compar*.tw.                                                     |
| 15. randomi*ed.tw.                                                  |
| 16. 9 or 10 or 11 or 12 or 13 or 14 or 15                           |
| 17. 1 or 2 or 3 or 4                                                |
| 18. Coxiella burnetii/                                              |
| 19. burnetii.tw.                                                    |
| 20. 18 or 19                                                        |
| 21. 17 not 20                                                       |
| 22. 5 or 6 or 7 or 8                                                |
| 24. limit 23 to (human and english language and yr="2010 -Current") |
